# Supplementary material
Source: HighWire-hosted journal article supplement (https://ez-admanager.com/highwire/filestream/136162/field_highwire_adjunct_files/0/85_24_2116.pdf)
Supplement: 85_24_2116.pdf [file 85_24_2116.pdf]

# 比利时人群队列研究显示*TBK-1*基因缺失 是额颞叶痴呆的常见病因

Ilse Gijselinck, PhD; Sara Van Mossevelde, MD; Julie van der Zee, PhD; Anne Sieben, MD;  
Stéphanie Philtjens, MSc; Bavo Heeman, PhD; Sebastiaan Engelborghs, PhD; Mathieu Vandenbulcke, PhD;  
Greet De Baets, PhD; Veerle Bäumer, BSc; Ivy Cuijt, MSc; Marleen Van den Broeck, BSc;  
Karin Peeters, BSc; Maria Mattheijssens, BSc; Frederic Rousseau, PhD; Rik Vandenberghe, PhD; Peter De Jonghe, PhD;  
Patrick Cras, PhD; Peter P. De Deyn, PhD; Jean-Jacques Martin, PhD; Marc Cruts, PhD;  
Christine Van Broeckhoven, DSc; On behalf of the BELNEU Consortium

**目的：***TBK-1* 基因参与肌萎缩侧索硬化症（amyotrophic lateral sclerosis, ALS）、额颞叶痴呆（frontotemporal dementia, FTD）和 FTD-ALS 的发病过程。本研究旨在研究比利时 FTD 和 ALS 患者中是否存在未知基因突变。

**方法：**我们对医院受试者进行 *TBK1* 测序，共纳入 482 例没有罹患 FTD 和 FTD-ALS 的受试者和 147 例 ALS 患者和一个比利时 FTD-ALS 患者家系 DR158。应用离体研究、转录和蛋白表达分析及免疫组织化学法对突变携带者进行随访。

**结果：**我们共甄别出 11 例功能缺失（loss-of-function, LOF）突变患者，总体突变率为 1.7%（11/629），其中 FTD 患者为 1.1%（5/460）、ALS 患者为 3.4%（5/147）、FTD - ALS 患者为 4.5%（1/22）。6 例患者中研究鉴别出 1 个 *TBK1* LOF 突变 p.Glu643del，这 6 例患者与患病家系 DR158 并无血缘关系。2 例突变携带者的特征性表现是大脑和脊髓的 TDP-43 阳性病

理学改变。这些包括 p.Glu643del 突变在内的 LOF 突变可致血液和大脑中缺乏特定的转录产物或蛋白质。

**结论：**这项比利时临床患者队列研究发现 *TBK-1* LOF 突变是引起临床 FTD 的第三大常见原因，仅次于 *C9orf72* 和 *GRN*，同时也是继 *C9orf72* 之后引起临床 ALS 的第二大常见原因。这些发现说明 FTD 和 ALS 属于同一疾病谱系。*Neurology*<sup>®</sup> 2016;85:2116–2125
